# Supplementary material
Source: Springer Nature journal article supplement (https://www.springermedizin.de/resource/supplementary/12937_2011_436_MOESM6_ESM.pdf/25653108)

### CCK kinetics after Solid Meal

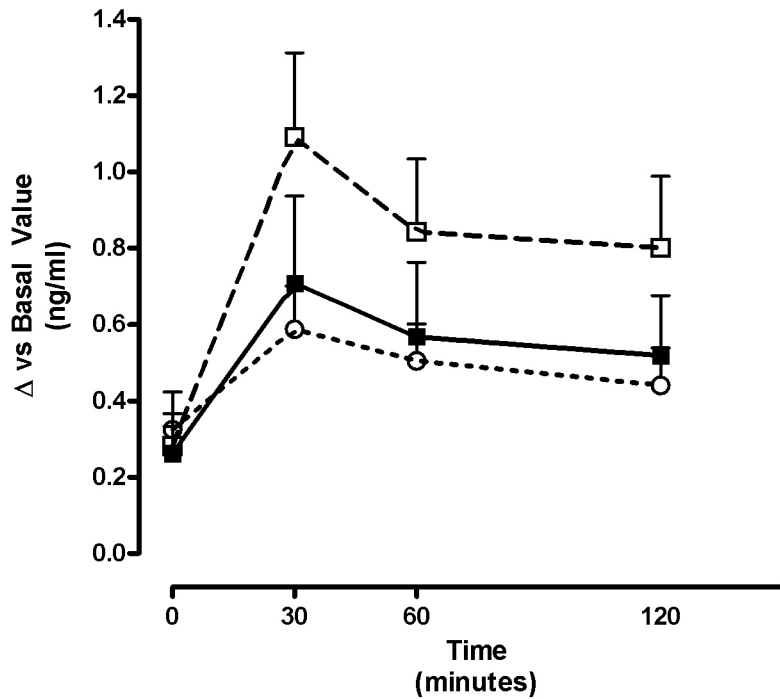

### CCK kinetics after Liquid Meal

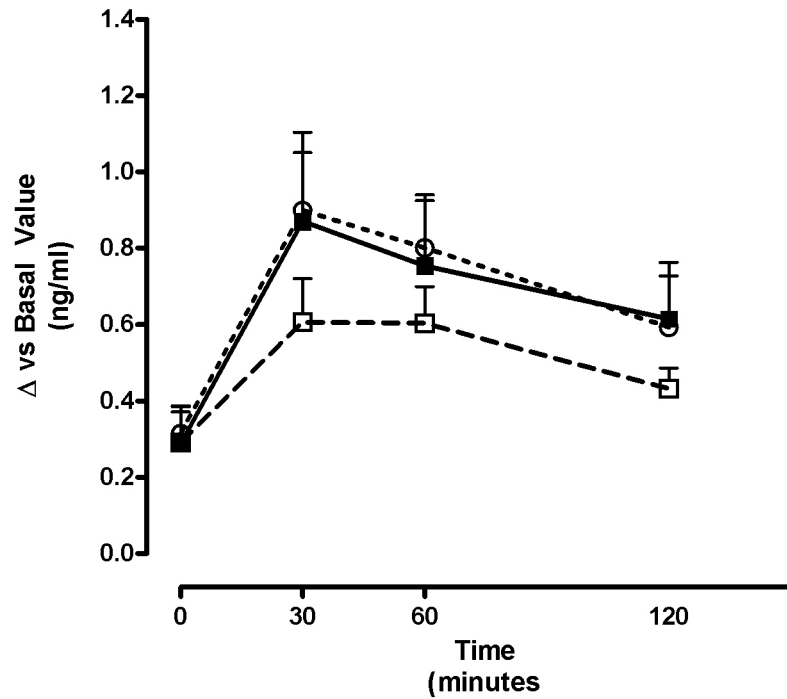

○ Water

■ B -CO<sub>2</sub>

□ B +CO<sub>2</sub>

Supplement: MOESM6 [file 25653108]
